# Supplementary material for: Effects of dulaglutide on alcohol consumption during smoking cessation
Source: PubMed Central journal article supplement (PMC10721313; doi:10.1172/jci.insight.170419), 2023-11-22
Supplement: jciinsight-8-170419-s182.pdf [file jciinsight-8-170419-s182.pdf]

1

CLINICAL RESEARCH ARTICLE

2

**Effects of dulaglutide on alcohol consumption during smoking cessation**

3

**Authors:** Leila Probst<sup>1,2</sup>, Sophie Monnerat<sup>1,2</sup>, Deborah R. Vogt<sup>2</sup>, Sophia Lengsfeld<sup>1,2</sup>, Thilo Burkard<sup>3,4</sup>,

4

Andrea Meienberg<sup>3,4</sup>, Cemile Bathelt<sup>1,2</sup>, Mirjam Christ-Crain<sup>1,2</sup> and Bettina Winzeler<sup>1,2</sup>

5

**Affiliations**

6

<sup>1</sup> Department of Endocrinology, Diabetology and Metabolism, University Hospital Basel, Basel,

7

Switzerland

8

<sup>2</sup> Department of Clinical Research, University of Basel and University Hospital Basel, Basel, Switzerland

9

<sup>3</sup> Department of Cardiology, University Hospital Basel, Basel, Switzerland

10

<sup>4</sup> Medical Outpatient Department, University Hospital Basel, Basel, Switzerland

|    |                                                                    |   |
|----|--------------------------------------------------------------------|---|
| 11 | <a href="#">Table of Contents</a>                                  |   |
| 12 | Methods .....                                                      | 3 |
| 13 | Statistical analysis.....                                          | 3 |
| 14 | Supplemental analysis.....                                         | 3 |
| 15 | Correlation between weight change and alcohol .....                | 3 |
| 16 | Model outputs.....                                                 | 4 |
| 17 | Alcohol consumption.....                                           | 4 |
| 18 | Tables .....                                                       | 5 |
| 19 | Supplementary Table S1: Baseline participant characteristics ..... | 5 |
| 20 | References.....                                                    | 6 |
| 21 |                                                                    |   |
| 22 |                                                                    |   |

## 23 Methods

### 24 Statistical analysis

25 The primary outcome, differences in total amount of alcohol intake in glasses per week at week 12, was  
26 analyzed using a generalized linear model with treatment (dulaglutide vs. placebo) and baseline alcohol  
27 consumption as predictors (basic model). A quasipoisson error distribution was used to account for  
28 overdispersion. The interaction between treatment and baseline alcohol consumption was examined  
29 by adding the interaction term to the basic model. The significance of the interaction term was defined  
30 as  $p < 0.05$ . The basic model for the primary outcome was further adjusted for baseline demographics  
31 (i.e., sex, age, level of education, baseline drug abuse, baseline BMI category) and the generalized linear  
32 model with the lowest quasi Akaike Information Criterion (qAIC) by backward selection using the bbmle  
33 package (1) was kept as final adjusted model. Treatment allocation and baseline alcohol consumption  
34 were used as fixed predictors, further adjusting for level of education had the lowest qAIC.

35 To analyze the correlation between changes in consumption of alcohol and smoking status at week 12,  
36 the point biserial correlation coefficient was calculated. Patients with missing values on smoking status  
37 at week 12 were counted as “still smoking”. Differences in smoking abstinence rates between baseline  
38 alcohol consumers vs. non-consumers were analyzed using a Chi-squared test. For this analysis, the full  
39 analysis set ( $n=255$ ) was used. Baseline characteristics and abstinence rates from nicotine at week 12 of  
40 patients who started drinking were summarized using descriptive statistics. Fisher’s exact test was used  
41 to test for group differences in proportions of participants who either started or stopped consuming  
42 drugs, who did not consume at either time point (baseline and week 12) or who consumed at both time  
43 points. For this analysis, a different set was used which consisted of all participants with data on drug  
44 consumption at baseline and week 12 ( $n=230$ ).

### 45 Supplemental analysis

#### 46 Correlation between weight change and alcohol

47 The correlation between changes in alcohol consumption and weight was estimated using Spearman’s  
48 rank correlation coefficient. Our data suggest that there was no correlation ( $\rho = -0.09$ ;  $p = 0.3$ )

**Generalized linear models: Output**

Dependent variable: alcohol consumption at week 12  
(glasses per week)

|                                                        | basic                         | adjusted                       | with interaction              |
|--------------------------------------------------------|-------------------------------|--------------------------------|-------------------------------|
| Dulaglutide                                            | 0.71 (0.52, 0.97)<br>p = 0.04 | 0.64 (0.47, 0.86)<br>p = 0.004 | 0.58 (0.37, 0.89)<br>p = 0.02 |
| Baseline alcohol consumption                           | 1.06 (1.05, 1.07)<br>p = 0.00 | 1.06 (1.05, 1.07)<br>p = 0.00  | 1.06 (1.04, 1.07)<br>p = 0.00 |
| No higher Education                                    |                               | 0.63 (0.47, 0.84)<br>p = 0.003 |                               |
| Interaction:<br>treatment baseline alcohol consumption |                               |                                | 1.03 (0.99, 1.07)<br>p = 0.19 |
| Intercept                                              | 3.56 (2.79, 4.48)<br>p = 0.00 | 4.52 (3.47, 5.81)<br>p = 0.00  | 3.67 (2.87, 4.63)<br>p = 0.00 |
| Observations                                           | 151                           | 151                            | 151                           |

## 52 Tables

## 53 Supplementary Table S1: Baseline participant characteristics

54 Data describe the full set and are given as medians [IQR] or numbers (%).

|                               | Overall (n=255)   | Non-drinkers (n=96) | Drinkers (n=159)  |
|-------------------------------|-------------------|---------------------|-------------------|
| <b>Age</b>                    | 43.0 [33.0, 53.0] | 43.0 [33.0, 53.0]   | 43.0 [33.0, 53.5] |
| <b>Female sex</b>             | 155 (60.8)        | 58 (60.4)           | 97 (61.0)         |
| <b>Ethnicity</b>              |                   |                     |                   |
| Caucasian                     | 247 (98.0)        | 90 (96.8)           | 157 (98.7)        |
| African                       | 2 (0.8)           | 1 (1.1)             | 1 (0.6)           |
| Hispanic                      | 3 (1.2)           | 2 (2.2)             | 1 (0.6)           |
| <b>Higher education</b>       | 151 (59.2)        | 68 (70.8)           | 83 (52.2)         |
| <b>BMI category</b>           |                   |                     |                   |
| normal weight (BMI 18.5-24.9) | 13 (5.7)          | 6 (6.5)             | 7 (5.1)           |
| overweight (BMI 25-29.9)      | 12 (5.2)          | 6 (6.5)             | 6 (4.4)           |
| obese (BMI >29.9)             | 204 (89.1)        | 81 (87.1)           | 123 (90.4)        |
| <b>Somatic comorbidities</b>  |                   |                     |                   |
| Pulmonal disease              | 57 (22.4)         | 20 (20.8)           | 37 (23.3)         |
| Cardiovascular disease        | 70 (27.5)         | 30 (31.2)           | 40 (25.2)         |
| Cancer                        | 17 (6.7)          | 6 (6.2)             | 11 (6.9)          |
| Gastrointestinal disease      | 28 (11.0)         | 8 (8.3)             | 20 (12.6)         |
| Metabolic disease             | 48 (18.9)         | 24 (25.3)           | 24 (15.1)         |
| Neurological disease          | 25 (9.8)          | 8 (8.3)             | 17 (10.7)         |
| <b>Psychiatric disease</b>    | 71 (27.8)         | 25 (26.0)           | 46 (28.9)         |
| <b>Nicotine consumption</b>   |                   |                     |                   |
| Pack years                    | 20.0 [11.0, 35.0] | 19.5 [10.8, 38.0]   | 20.0 [11.0, 35.0] |
| Cigarettes per day            | 20.0 [15.0, 20.0] | 20.0 [15.0, 25.0]   | 20.0 [15.0, 20.0] |
| Fagerstroem score             | 7.0 [6.0, 8.0]    | 7.0 [6.0, 8.0]      | 7.0 [6.0, 8.0]    |
| <b>Substance abuse</b>        | 24 (9.4)          | 7 (7.3)             | 17 (10.7)         |

55

56

## References

57

1. Bolker B, R Development Core Team. bbmle: Tools for General Maximum Likelihood

58

Estimation. Published 2022. Accessed January 17, 2023.

59

<https://github.com/bbolker/bbmle>
